# Supplementary material for: A Novel Method That Allows SNP Discrimination with 160:1 Ratio for Biosensors Based on DNA-DNA Hybridization
Source: MDPI journal article supplement (doi:10.3390/bios11080265), 2021-08-06
Supplement: s1 [file s1]

# **A Novel Method that allows SNP Discrimination with 160:1 ratio for Biosensors Based on DNA-DNA hybridization**

Satish Balasaheb Nimse,<sup>a†</sup> Keum-Soo Song,<sup>b†</sup> Shrikant Dashrath Warkad,<sup>b</sup> Taisun Kim<sup>a\*</sup>

<sup>a</sup>Institute for Applied Chemistry and Department of Chemistry, Hallym University, Chuncheon, 200-702, Korea, Fax: +82-33-256-3421, E-mail: [tskim@hallym.ac.kr](mailto:tskim@hallym.ac.kr)

<sup>b</sup>Biometrix Technology, Inc. 202 BioVenture Plaza, Chuncheon, 200-161, Korea

## **Supporting Information**

**Table S1.** Sequences of the probes used for derivation of SWAT

| Probes        | Sequence                                                                | T <sub>m</sub> (°C) |                         |
|---------------|-------------------------------------------------------------------------|---------------------|-------------------------|
|               |                                                                         | [4(G+C)+2(A+T)-5]   | Nearest neighbor method |
| <b>Probe1</b> | 5'-9G-vertical spacer-TAC CGA CCC AC <sup>G</sup> CGG GC-3'             | 55                  | 55.96                   |
| <b>Probe2</b> | 5'-9G-vertical spacer-TAC CG <sup>G</sup> CCC AC <sup>G</sup> CGG GC-3' | 57                  | 58.45                   |
| <b>Probe3</b> | 5'-9G-vertical spacer-TAC CG <sup>G</sup> CCC ACC CGG GC-3'             | 57                  | 56.30                   |
| <b>Probe4</b> | 5'-9G-vertical spacer-TAC CGA CCC AC <sup>G</sup> TGG GC-3'             | 53                  | 52.37                   |
| <b>Probe5</b> | 5'-9G-vertical spacer-TAC CG <sup>G</sup> CCT AC <sup>G</sup> CGG GC-3' | 55                  | 56.78                   |
| <b>Probe6</b> | 5'-9G-vertical spacer-TAC CG <sup>G</sup> CCC ACC TGG GC-3'             | 55                  | 54.3                    |

9G- nine consecutive guanines (GGG GGG GGG) used for the immobilization of the probes on the AMCA DNACChip; Vertical spacer- nine consecutive thymidine's (TTT TTT TTT); T<sub>M</sub>: melting temperature

**Table S2.** Sequences of probes used for the detection and discrimination of MTB strains and NTM Strains

| Probes           | Probe Description | Sequence                                                    | T <sub>m</sub> (°C) |
|------------------|-------------------|-------------------------------------------------------------|---------------------|
| <b>Probe7</b>    | <i>MTB</i>        | 5'-9G-vertical spacer-TAG CGA CCG AC <sup>G</sup> TGG GC-3' | 53                  |
| <b>Probe8</b>    | <i>Chelonae</i>   | 5'-9G-vertical spacer-TAC CGG CCT AC <sup>G</sup> CGG GC-3' | 55                  |
| <b>Probe9</b>    | <i>Avium</i>      | 5'-9G-vertical spacer-TAG CGG CCC ACC TGG GC-3'             | 55                  |
| <b>Probe10</b>   | <i>Marinum</i>    | 5'-9G-vertical spacer-TAC CGG CCC ACC TGG GC-3'             | 55                  |
| <b>Probe11</b>   | <i>Abscessus</i>  | 5'-9G-vertical spacer-TAC CGA CCC AC <sup>G</sup> TGG GC-3' | 53                  |
| <b>Probe12</b>   | <i>kansasii</i>   | 5'-9G-vertical spacer-TAT CGG CCG ACATGG GC-3'              | 53                  |
| <b>Probe13</b>   | PCR               | 5'-9G-vertical spacer-CGA CCS ACV CGS GCC AGG TC -3'        | 61                  |
| <b>Probe14</b>   | NC                | 5'-9G-vertical spacer-GCC AGG TCG TAG CGC TTC TC-3'         | 61                  |
| <b>Probe15</b>   | HC                | 5'-9G-vertical spacer-CCT AGT GGC TCT ATG GTA AC-3'         | 55                  |
| <b>HC-Cy5-T1</b> | HC Target DNA     | 3'- GGA TCA CCG AGA TAC CAT TG GAG ACT GCG -Cy5-5'          |                     |

HC – probe for the Hybridization control; HC-Cy5-T1 – Target oligonucleotide for HC probe9G- nine consecutive guanines (GGG GGG GGG) used for the immobilization of the probes on the AMCA DNACChip; Vertical spacer- nine consecutive thymidine's (TTT TTT TTT); T<sub>M</sub>: melting temperature

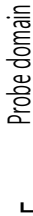

**S3**

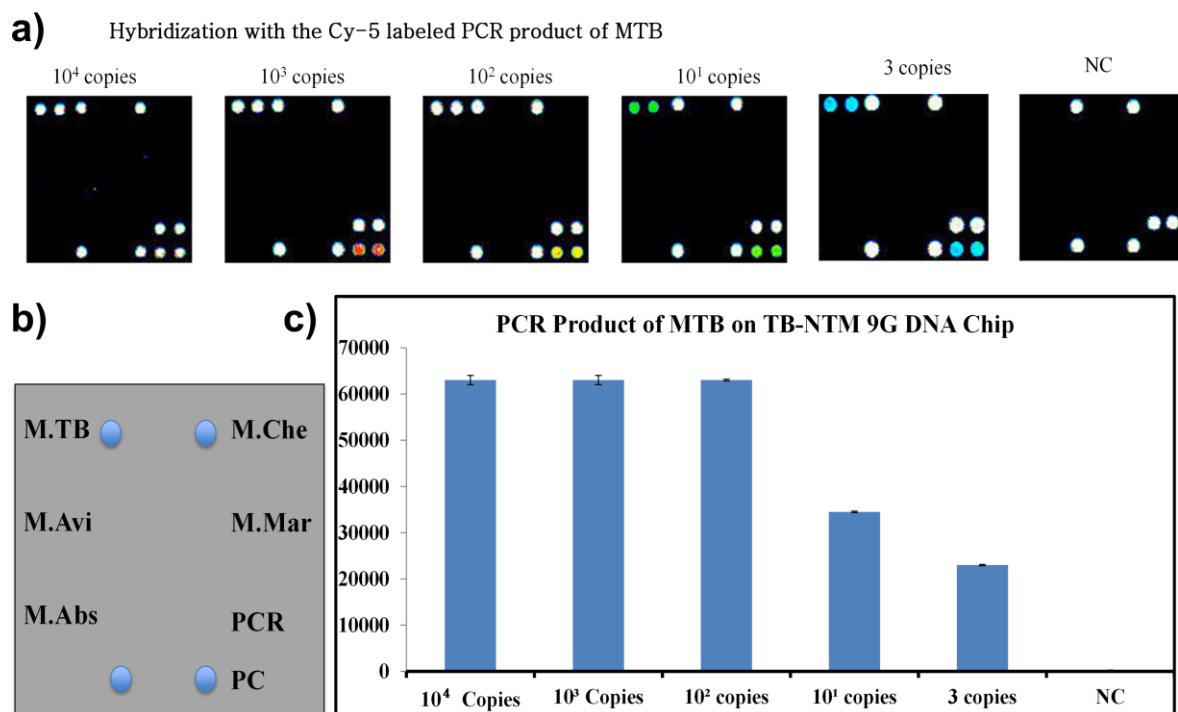

**Figure S2:** Limit of detection for the identification of MTB.

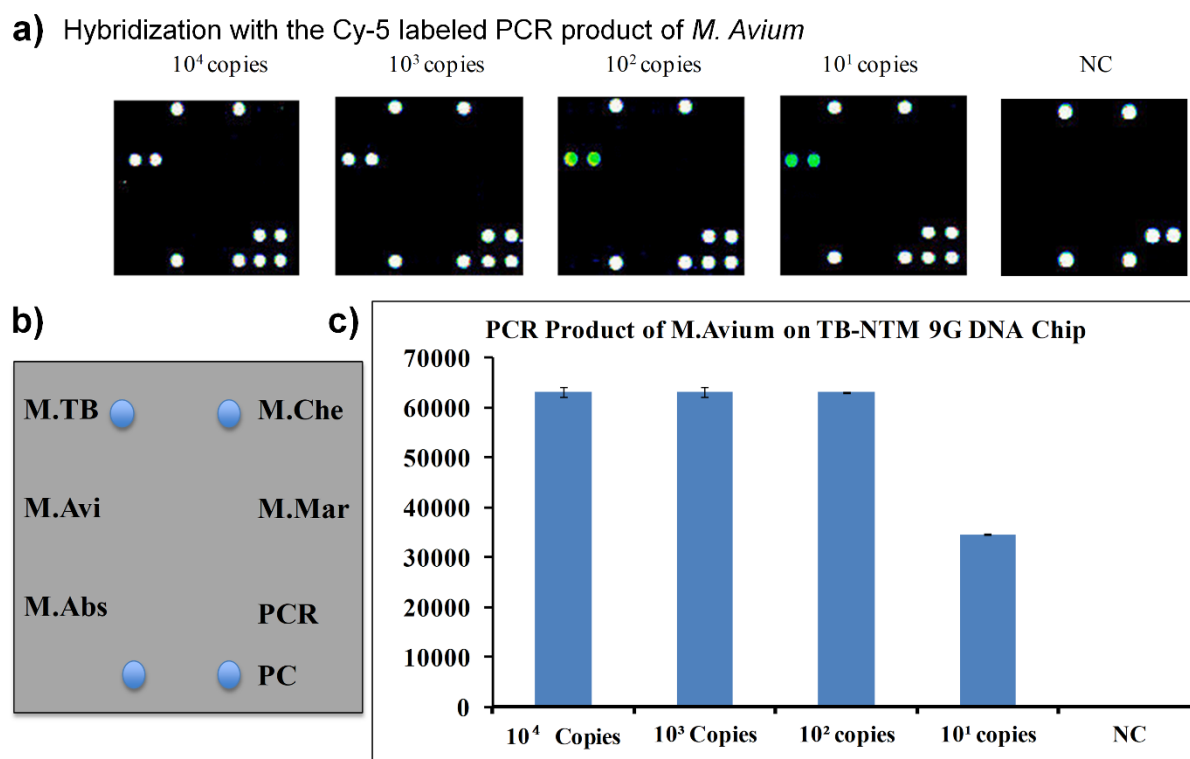

**Figure S3:** Limit of detection for the identification of *Mycobacterium Avium*.

a) Hybridization with the Cy-5 labeled PCR product of *M. Abscessus*

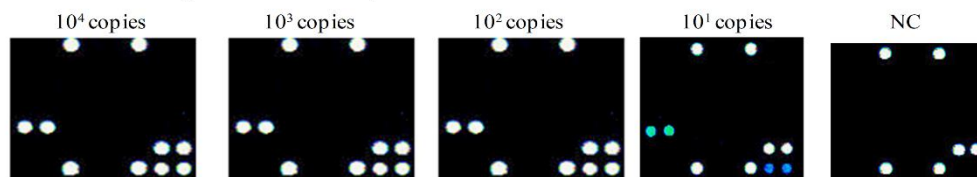

b)

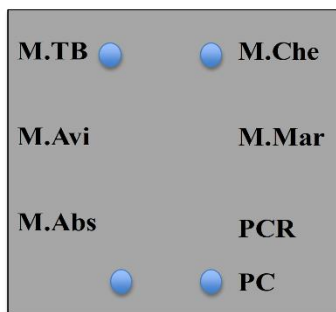

c)

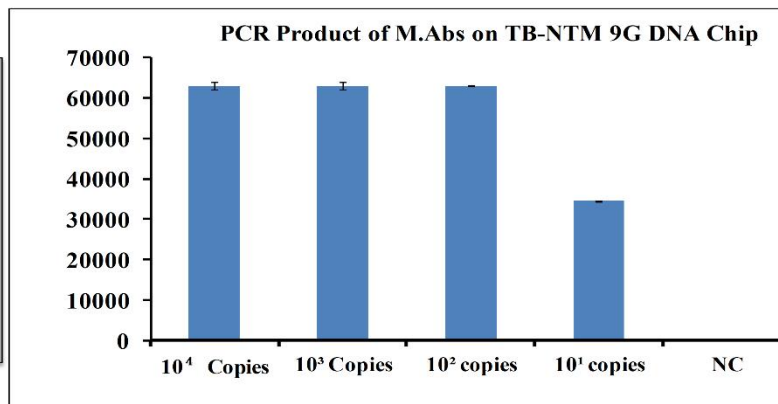

**Figure S4:** Limit of detection for the identification of *Mycobacterium Abscessus*.

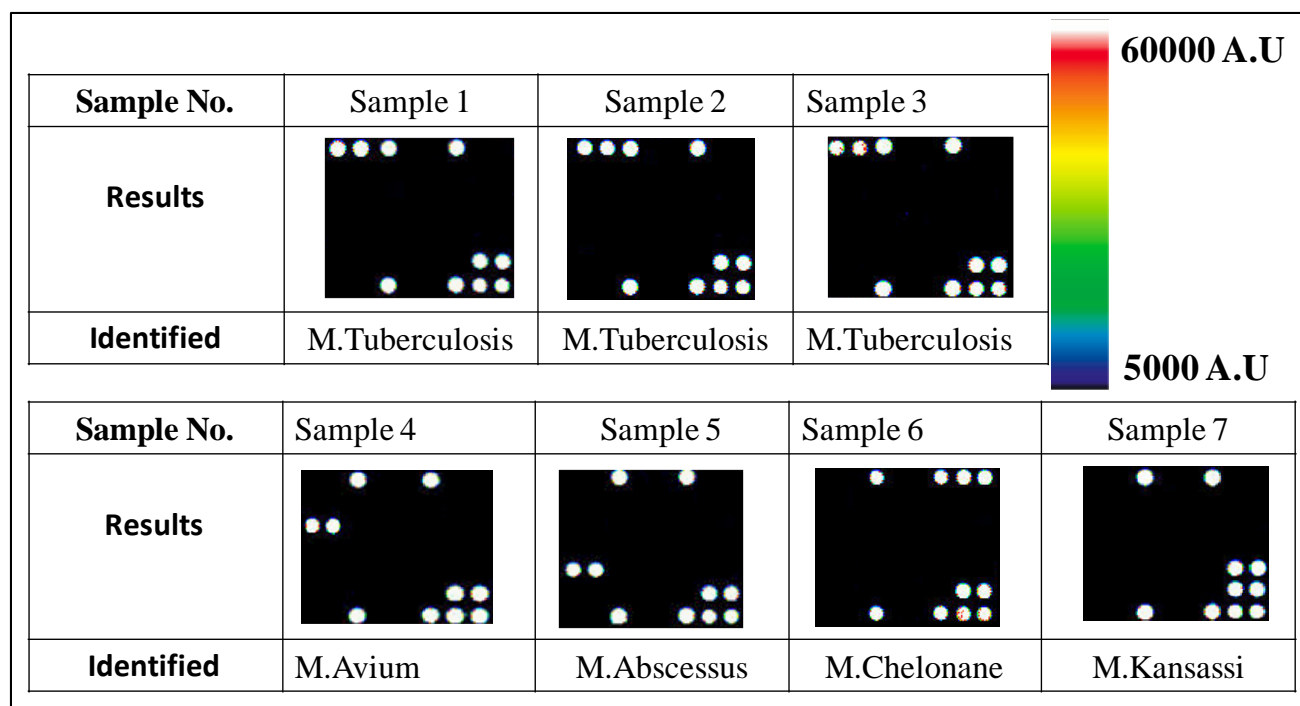

**Figure S5:** The detection and discrimination of the MTB and NTM strain in the clinical samples.
